# Supplementary material for: Validation of an Academic Self-Attribution Questionnaire for Primary and Secondary School Students: Implications of Gender and Grade
Source: MDPI journal article supplement (doi:10.3390/ijerph19106045), 2022-05-16
Supplement: s1 [file s1]

**Academic Success and Failure Attribution Questionnaire (León and Mendo, 2020)**

**Mark with an X the number that best fits the causes you use as an explanation when in general you pass or fail an exam.**

| <b>1</b>                 | <b>2</b>              | <b>3</b>              | <b>4</b>              | <b>5</b>                 |
|--------------------------|-----------------------|-----------------------|-----------------------|--------------------------|
| <b>Nothing Agreement</b> | <b>Some Agreement</b> | <b>Some Agreement</b> | <b>Very Agreement</b> | <b>Totally Agreement</b> |

**Success: I approve**

|                                                                                                                 |   |   |   |   |   |
|-----------------------------------------------------------------------------------------------------------------|---|---|---|---|---|
| I approve because I try hard in class                                                                           | 1 | 2 | 3 | 4 | 5 |
| I approve because I try hard in class                                                                           | 1 | 2 | 3 | 4 | 5 |
| I approve because I try hard in class                                                                           | 1 | 2 | 3 | 4 | 5 |
| I approve because I use some strategy to prepare the exams (I organize, summarize, review, memorize the topics) | 1 | 2 | 3 | 4 | 5 |
| I approve because I'm so smart                                                                                  | 1 | 2 | 3 | 4 | 5 |
| I approve because I have a very good memory                                                                     | 1 | 2 | 3 | 4 | 5 |
| I approve because I have a lot of talent, that is, I have a lot of natural capacity for studies.                | 1 | 2 | 3 | 4 | 5 |
| I pass because I have a calm character and I don't get nervous in exams                                         | 1 | 2 | 3 | 4 | 5 |
| I pass because teachers put easy exams                                                                          | 1 | 2 | 3 | 4 | 5 |
| I approve because I have good luck                                                                              | 1 | 2 | 3 | 4 | 5 |
| I approve because my teachers explain the topics very well.                                                     | 1 | 2 | 3 | 4 | 5 |
| I approve because my teachers explain the topics very well                                                      | 1 | 2 | 3 | 4 | 5 |

**Failure: I suspend**

|                                                                                                                  |   |   |   |   |   |
|------------------------------------------------------------------------------------------------------------------|---|---|---|---|---|
| I fail because I try little in class                                                                             | 1 | 2 | 3 | 4 | 5 |
| I fail because I spend little time preparing for exams                                                           | 1 | 2 | 3 | 4 | 5 |
| I fail because I pay little attention in classes                                                                 | 1 | 2 | 3 | 4 | 5 |
| I fail because I do not use strategies to prepare the exams (I organize, summarize, review, memorize the topics) | 1 | 2 | 3 | 4 | 5 |
| I fail because I'm not very smart                                                                                | 1 | 2 | 3 | 4 | 5 |
| I fail because I don't have a good memory                                                                        | 1 | 2 | 3 | 4 | 5 |
| I fail because I have little talent, that is, I have little natural capacity for studies.                        | 1 | 2 | 3 | 4 | 5 |

|                                                                          |   |   |   |   |   |
|--------------------------------------------------------------------------|---|---|---|---|---|
| I fail because I have a nervous character and I can't calm down on exams | 1 | 2 | 3 | 4 | 5 |
| I fail because teachers take difficult exams                             | 1 | 2 | 3 | 4 | 5 |
| I suspend because I'm unlucky                                            | 1 | 2 | 3 | 4 | 5 |
| I fail because my teachers do not explain the topics well.               | 1 | 2 | 3 | 4 | 5 |
| I fail because the level of demand in my class is very high.             | 1 | 2 | 3 | 4 | 5 |

ASFAQ Percentiles

|             |         | Controllable<br>internals<br>Success | Non-<br>controllable<br>internals<br>Success | Externals<br>Success | Controllable<br>internals<br>Failure | Non-<br>controllable<br>internals<br>Failure | Externals<br>Failure |
|-------------|---------|--------------------------------------|----------------------------------------------|----------------------|--------------------------------------|----------------------------------------------|----------------------|
| N           | Valid   | 562                                  | 562                                          | 562                  | 562                                  | 562                                          | 562                  |
|             | Missing | 0                                    | 0                                            | 0                    | 0                                    | 0                                            | 0                    |
| Percentiles | 10      | 10                                   | 7                                            | 7                    | 4                                    | 4                                            | 4                    |
|             | 20      | 12                                   | 9                                            | 8                    | 4                                    | 4                                            | 4                    |
|             | 30      | 14                                   | 11                                           | 9                    | 4                                    | 5                                            | 5                    |
|             | 40      | 15                                   | 12                                           | 10                   | 5                                    | 6                                            | 5                    |
|             | 50      | 16                                   | 13                                           | 10                   | 6                                    | 6                                            | 7                    |
|             | 60      | 16                                   | 14                                           | 11                   | 8                                    | 8                                            | 7                    |
|             | 70      | 17                                   | 15                                           | 12                   | 9                                    | 10                                           | 9                    |
|             | 80      | 18                                   | 16                                           | 13                   | 12                                   | 12                                           | 11                   |
|             | 90      | 19                                   | 18                                           | 14                   | 14                                   | 14,7                                         | 13                   |
|             | 100     | 20                                   | 20                                           | 20                   | 20                                   | 20                                           | 20                   |
